# Supplementary material for: Comparative Evaluation of Inducible Cre Mouse Models for Fibroblast Targeting in the Healthy and Infarcted Myocardium
Source: MDPI journal article supplement (doi:10.3390/biomedicines10102350), 2022-09-21
Supplement: s1 [file s1]

Supplementary Materials:

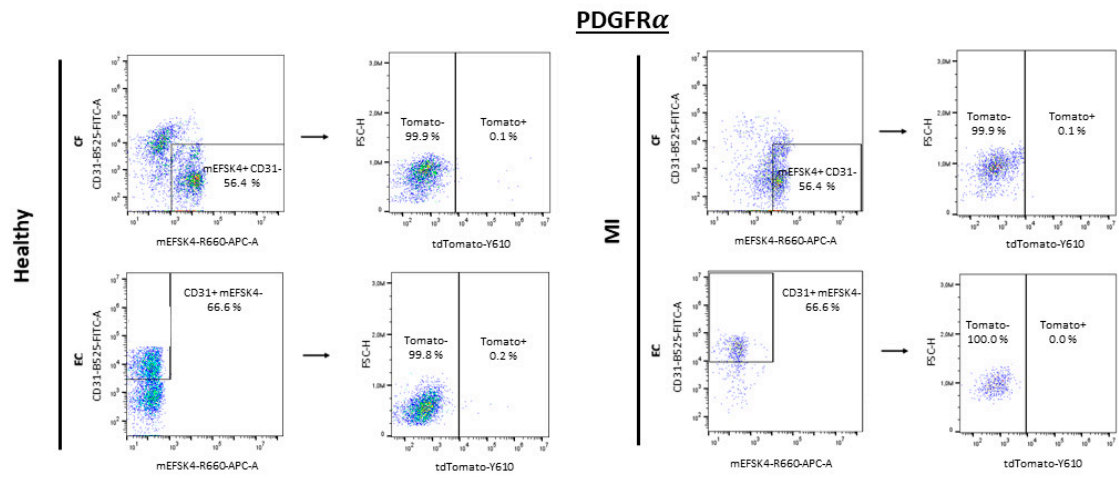

**Supplementary Figure S1. Flow cytometry plots of PDGFR $\alpha$  Cre- controls.** Representative flow cytometry plots of tdTomato+ cells from mEFSK4+ / CD31- (CF) or from mEFSK4- / CD31+ (EC) subpopulations of healthy control and MI hearts.

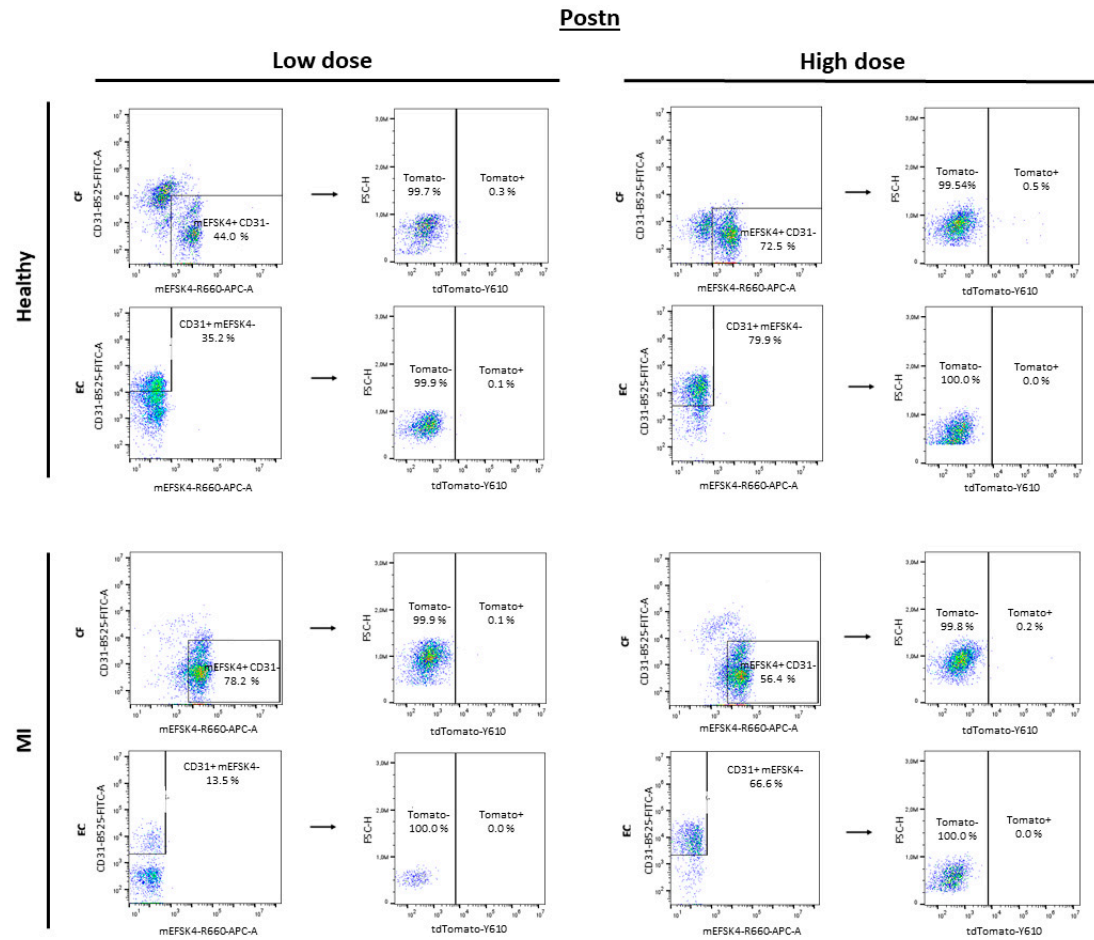

**Supplementary Figure S2. Flow cytometry plots of Postn Cre- controls.** Representative flow cytometry plots of tdTomato+ cells from mEFSK4+ / CD31- (CF) or from mEFSK4- / CD31+ (EC) subpopulations of healthy control and MI hearts treated with low and high tamoxifen doses.

### Col1a1

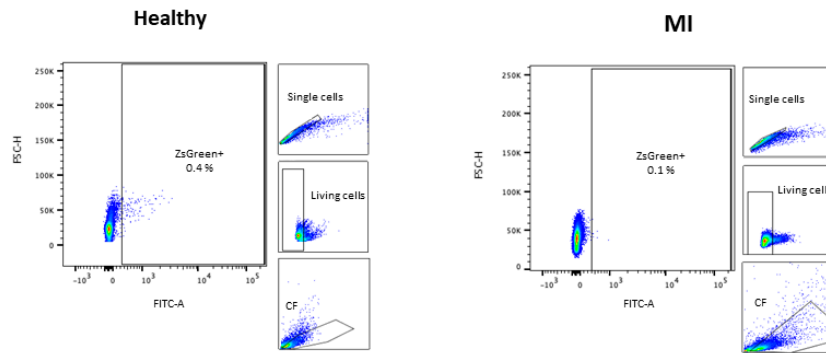

**Supplementary Figure S3. Flow cytometry plots of Col1a1 Cre- controls.** Representative flow cytometry plots ZsGreen+ cells isolated from the living cell populations (ancestry gates are shown on the right of the plot) of healthy and MI mice hearts.

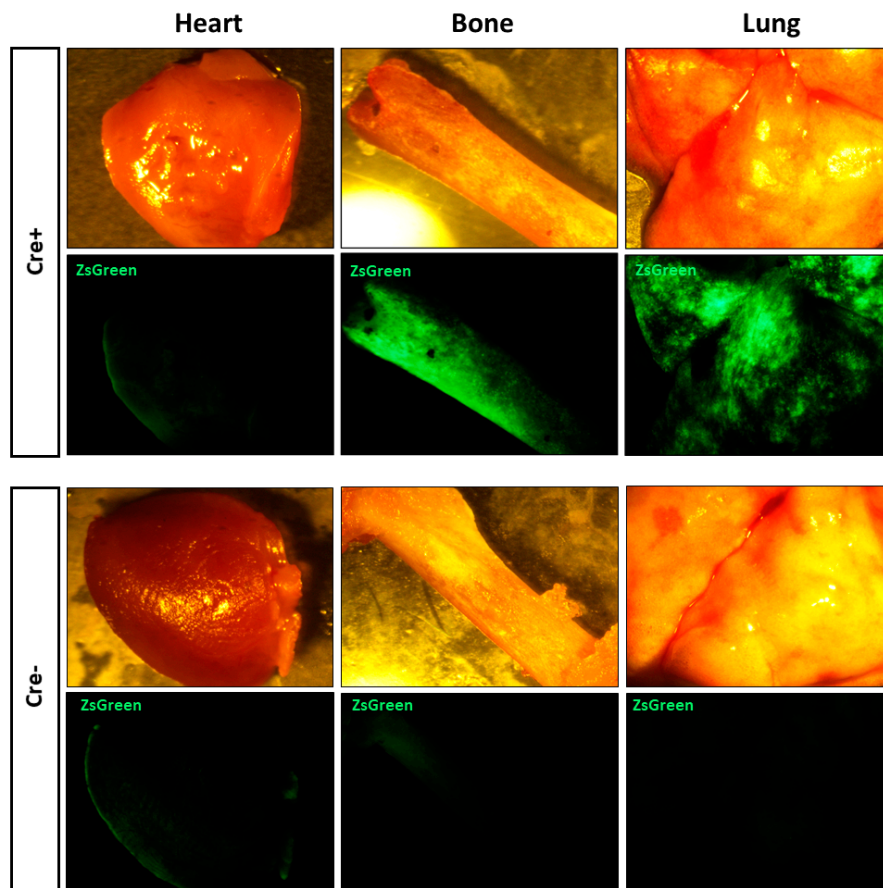

**Supplementary Figure S4. Col1a1-CreERT2 mouse model validation.** Representative images of the heart, bone and lung from Col1a1-CreERT2 x ZsGreen mice for direct ZsGreen fluorescence. High dose tamoxifen treated Cre+ and Cre- control mice are shown.

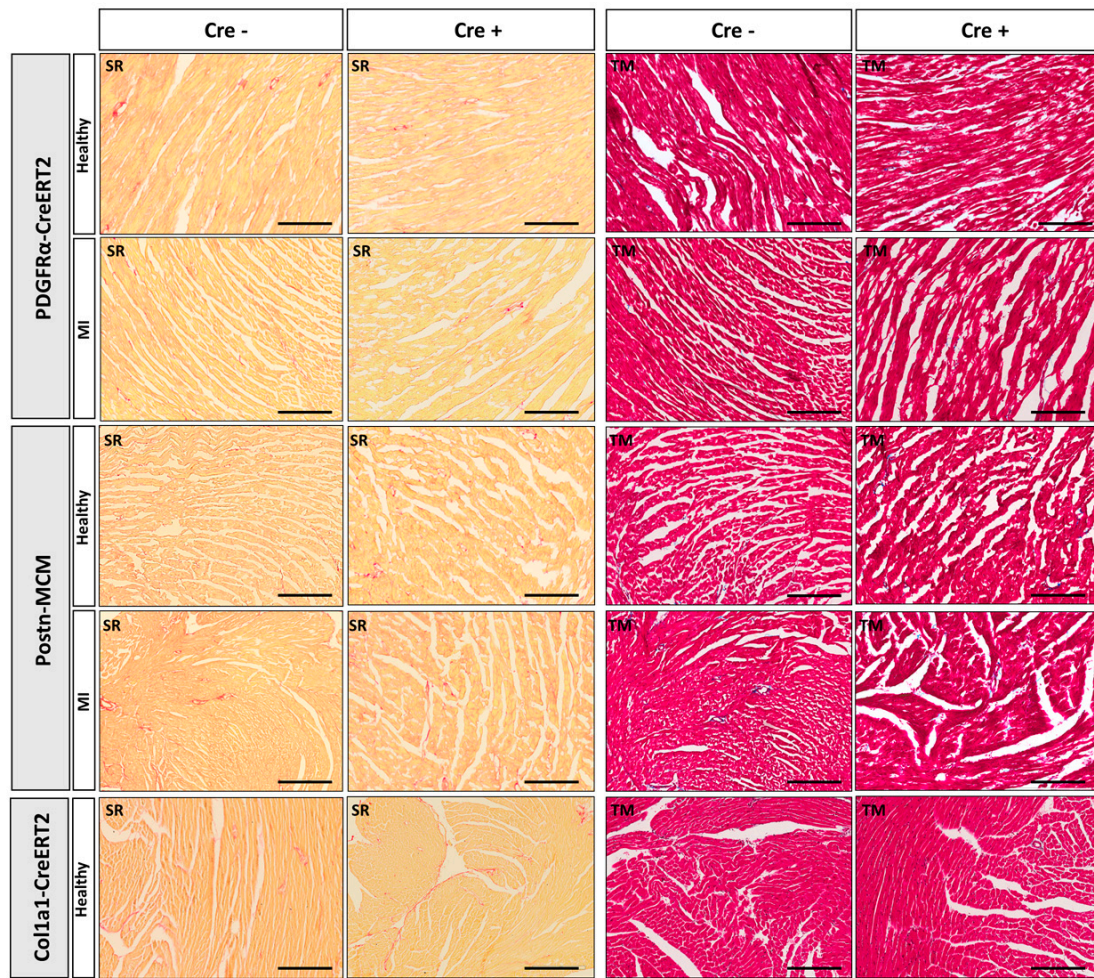

**Supplementary Figure S5. Cardiotoxicity analyses in Cre-inducible mice lines.** Representative images of Sirius red and Masson's trichrome heart-sections from Pdgfra-CreERT2, PostMCM and Col1a1-CreERT2 Cre+ and Cre- tamoxifen-treated mice (healthy and MI) are shown. Pictures show the remote area of the infarcted hearts. Scale bars: 200 $\mu$ m.
